# Supplementary material for: The miR-200 family and miR-205 regulate epithelial to mesenchymal transition by targeting ZEB1 and SIP1
Source: Springer Nature journal article supplement (doi:10.1038/ncb1722), 2008-03-30
Supplement: 41556_2008_BFncb1722_MOESM26_ESM.pdf [file 41556_2008_BFncb1722_MOESM26_ESM.pdf]

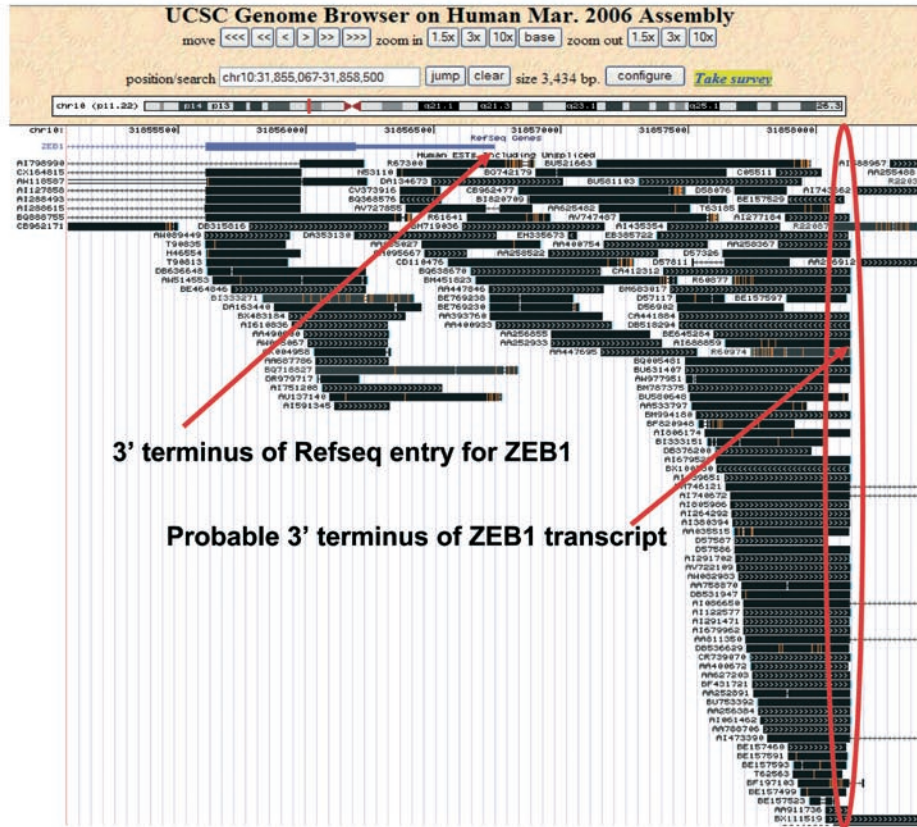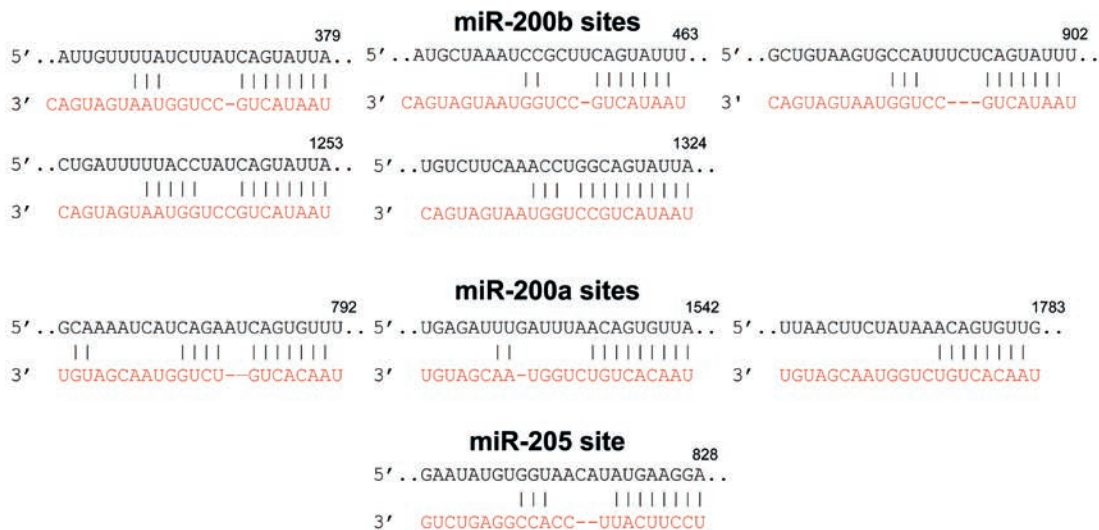

**Figure S1** ZEB1 full length mRNA. **(a)** Analysis of the ZEB1 mRNA using the UCSC genome browser (<http://genome.ucsc.edu>) revealed truncation of the annotated Refseq sequence (NM\_030751). The probable terminus of the ZEB1 3'UTR is indicated by multiple expressed

sequence tags (ESTs) ending at the same position (~1.2 kb downstream of the Refseq terminus). **(b)** Predicted interactions of miR-200a, miR-200b and miR-205 with their binding sites in the ZEB1 3'UTR. MicroRNA sequences are shown in red.

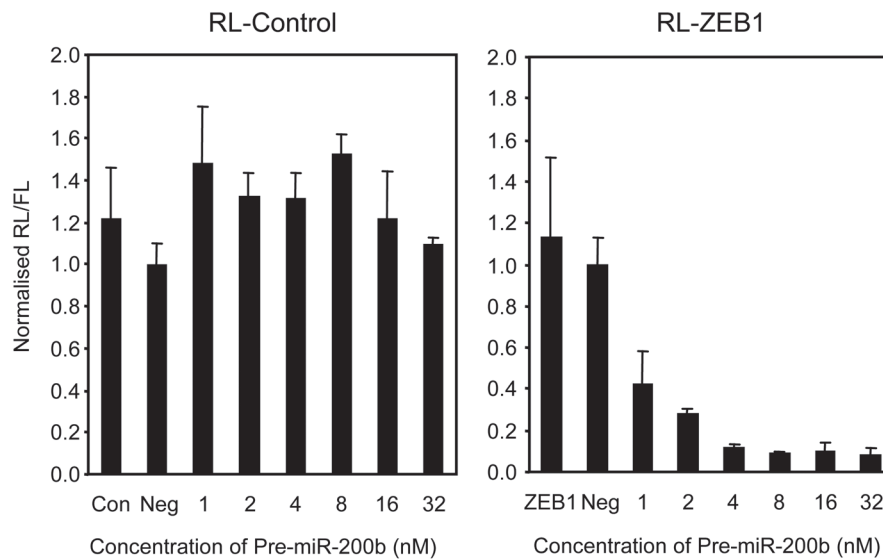

**Figure S2** Determination of the minimum effective concentration of Pre-miR for inhibiting reporter expression. A range of concentrations of miR-200b Pre-miR was cotransfected with RL-Control or RL-ZEB1. Comparisons are made with samples without cotransfected microRNA (Con

or ZEB1) or cotransfected with a negative control Pre-miR (Neg). The pGL3 plasmid was cotransfected to normalise for transfection efficiency and the ratio of Renilla to Firefly luciferase activity is shown from a triplicate transfection  $\pm$  s.e.m. (n=3).

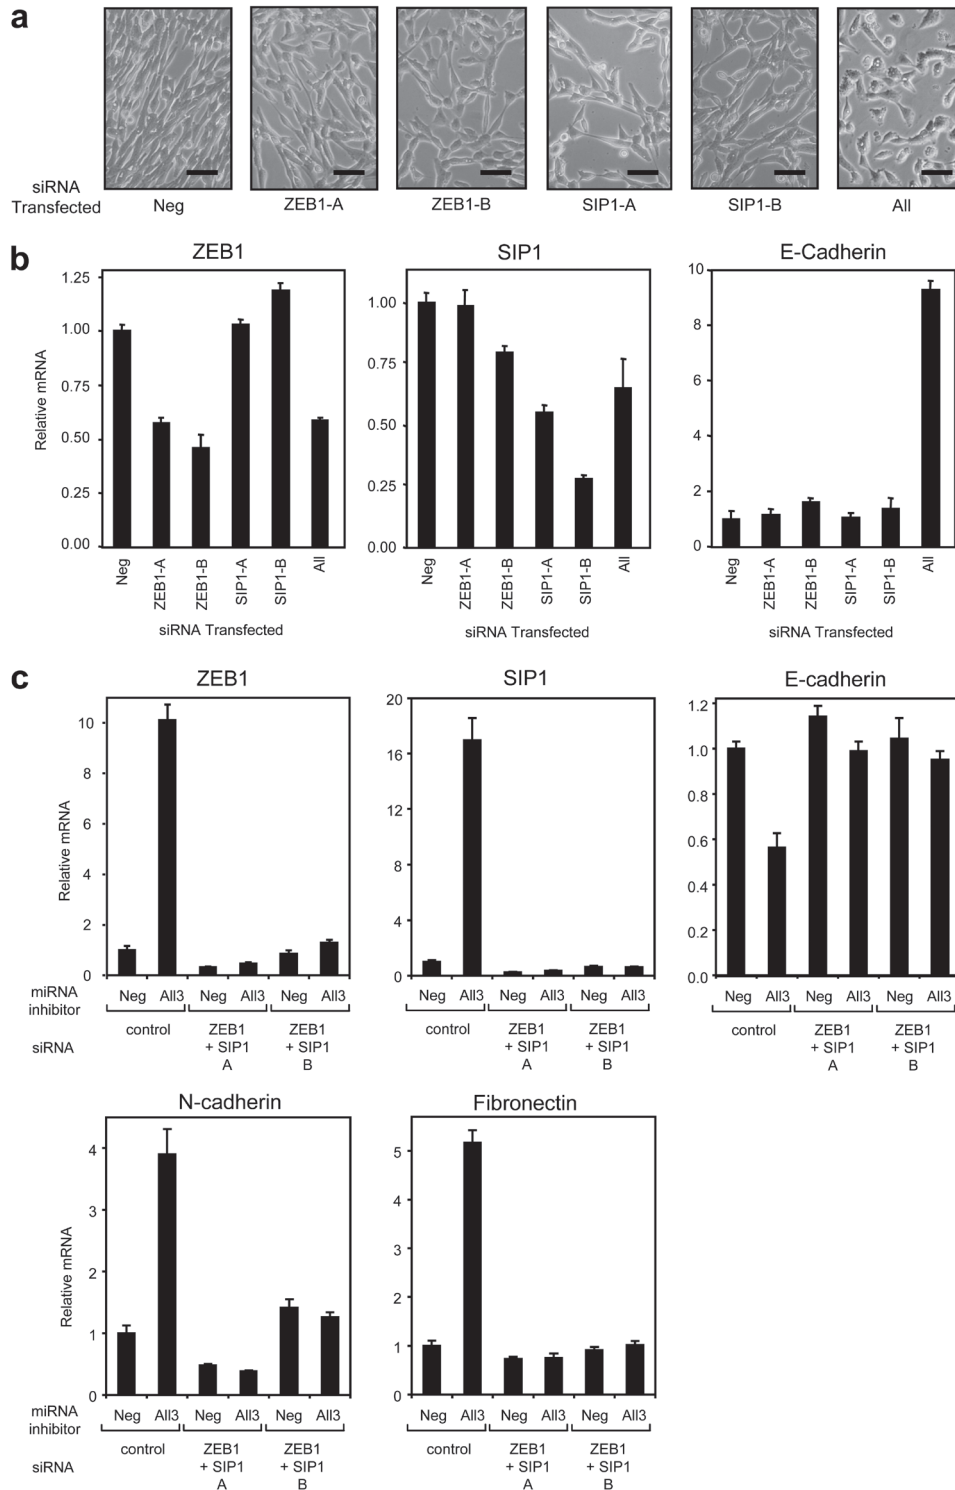

**Figure S3** ZEB1 and SIP1 siRNA knockdown and their effect on MDCK-Pez cells, and EMT in MDCK cells mediated by microRNA inhibition. **(a)** Phase contrast microscopy of MDCK-Pez cells transfected with individual ZEB1 and SIP1 siRNAs (A and B) either separately or in combination (All) for 3 days. Comparisons were made with a non-targeting siRNA (Neg). Scale bars represent 50  $\mu$ m. **(b)** Quantitation by real time PCR of ZEB1, SIP1 and E-cadherin after ZEB1 and/or SIP1 knockdown. Transfections were carried out with 20 nM of each individual siRNA or 5 nM each of the four siRNAs (All).

The data are taken from a representative experiment of three transfection experiments with PCR performed in triplicate and are shown  $\pm$  s.e.m. (n=3). **(c)** Quantitation by real time PCR of EMT markers after concurrent miR-200a, miR-200b, and miR-205 inhibition (All3) or treatment with a negative control inhibitor (Neg), with or without ZEB1 and SIP1 knockdown. Successive transient transfections were performed at 3-4 day intervals for a total of nineteen days. The data are taken from two transfection experiments with qPCR performed in triplicate and are shown  $\pm$  s.e.m. (n=6).

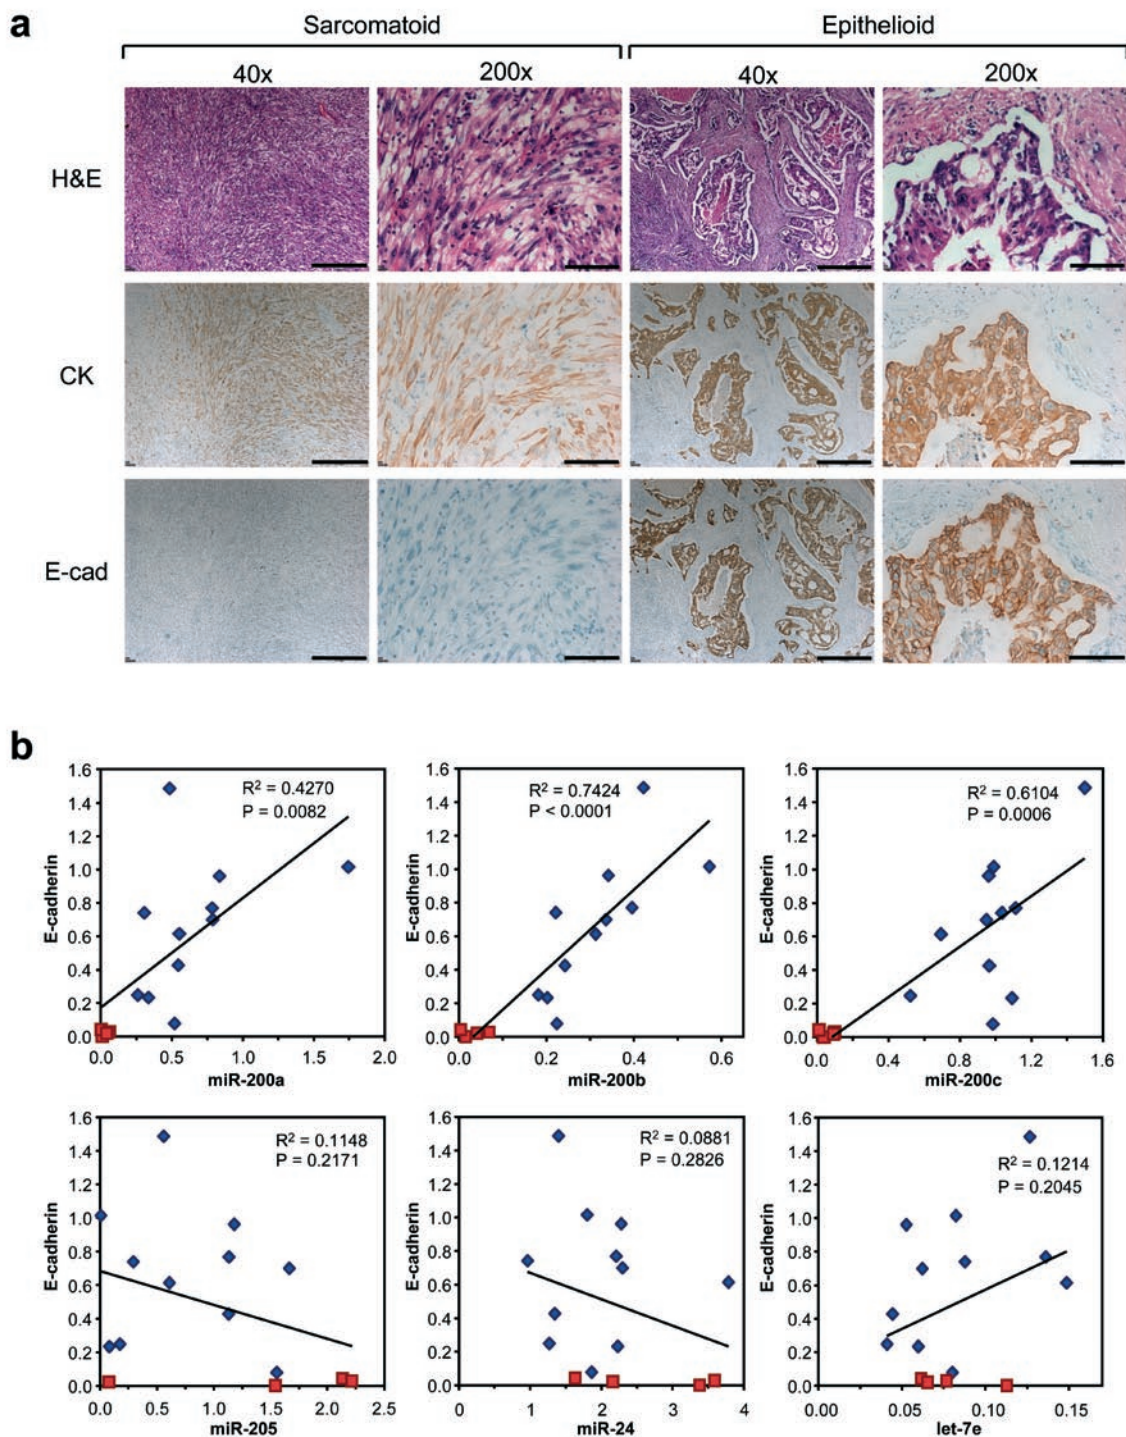

**Figure S4** E-cadherin and microRNA levels in metaplastic and ductal tumours. **(a)** Representative photographs (taken at 40x and 200x) of the mesenchymal and the epithelial areas of a metaplastic breast cancer, from a histologic section stained with Haematoxylin and Eosin (H&E), with corresponding results of immunohistochemistry using cytokeratin (CK) and E-cadherin. In this specimen, discrete mesenchymal (sarcomatoid) and epithelial (epithelioid) regions were observed. The epithelioid region expressed E-cadherin and retained epithelial features, whereas the sarcomatoid region displayed a spindle shaped morphology and lacked

E-cadherin. Despite the morphologic heterogeneity of metaplastic carcinoma, cytokeratin is often expressed in both the epithelioid and sarcomatoid regions, as in the example above, implying they are derived from epithelial origin. In addition, the patterns of metastasis of metaplastic tumours are similar to those of the more common types of breast cancer, so that for diagnostic and therapeutic purposes this tumour is regarded as a form of breast carcinoma, rather than a sarcoma. **(b)** Relationship between E-cadherin and microRNA levels in ductal and metaplastic tumours. Ductal tumours are coloured in blue and metaplastic in red. Pearson correlation coefficients are shown.

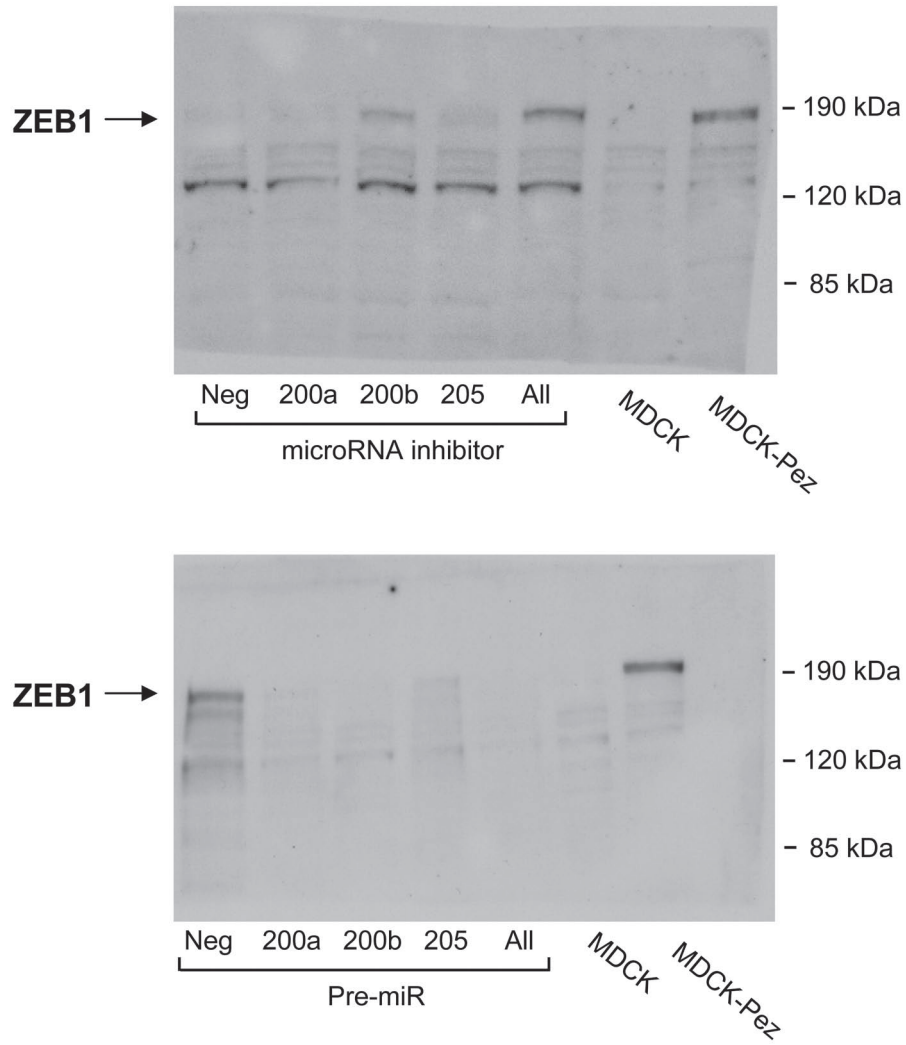

**Figure S5** Full scan images of immunoblots shown in Figure 4. Membranes were cut according to the pre-stained molecular weight markers and probed with a ZEB1-specific antibody.

**Table S1** Oligonucleotides used in real-time PCR, cloning, and knockdown studies. Primers are labelled by gene name, species (where appropriate) and direction (5' = for, 3' = rev). miRNA knockdown RNAs are 2'-O-methyl modified. Primers used for mutating the miR-200b seed regions in the ZEB1 and SIP1 3'UTRs are numbered according to their position from 5' to 3' with mutated bases marked in bold.

**Table S1 Oligonucleotides used in real-time PCR, cloning, and knockdown studies**

| Primer Name                                  | Sequence (5' to 3')                                                                 |
|----------------------------------------------|-------------------------------------------------------------------------------------|
| <b><u>Real time PCR</u></b>                  |                                                                                     |
| ZEB1 hum-dog for                             | TTCAAACCCATAGTGGTTGCT                                                               |
| ZEB1 hum-dog rev                             | TGGGAGATACCAAACCAACTG                                                               |
| SIP1 hum for                                 | CAAGAGGCGCAAACAAGC                                                                  |
| SIP1 hum rev                                 | GGTTGGCAATACCGTCATCC                                                                |
| SIP1 dog for                                 | CGGTCCAGAAGAAATGAAGG                                                                |
| SIP1 dog rev                                 | TCCTCAAAGTCTGATGTGCAA                                                               |
| E-cadherin hum for                           | CCCACCACGTACAAGGGTC                                                                 |
| E-cadherin hum rev                           | CTGGGGTATTGGGGGCATC                                                                 |
| E-cadherin dog for                           | AAGCGGCTCTACAACCTCA                                                                 |
| E-cadherin dog rev                           | AACTGGGAAATGTGAGCACC                                                                |
| N-cadherin dog for                           | CAACTTGCCAGAAAACCTCCAGG                                                             |
| N-cadherin dog rev                           | ATGAAAACCGGGCTATCAGCTC                                                              |
| Fibronectin dog for                          | GCAACTCTGTGGACCAAGG                                                                 |
| Fibronectin dog rev                          | CACTGGCACGAGAGCTTAAA                                                                |
| GAPDH hum for                                | ACCCAGAAGACTGTGGATGG                                                                |
| GAPDH dog for                                | CATCACTGCCACCCAGAAG                                                                 |
| GAPDH hum-dog rev                            | CAGTGAGCTTCCCGTTCAG                                                                 |
| <b><u>ZEB1/SIP1 3'UTR cloning</u></b>        |                                                                                     |
| ZEB1 3'UTR for                               | CAACTAGTCAAAAATAAAATCCGGGTGTGC                                                      |
| ZEB1 3'UTR rev                               | TTACTAGTACAGCAGTTCAGGCTTGTGTA                                                       |
| SIP1 3'UTR for                               | ATACTAGTGGAGTTGGAGCTGGGTATTG                                                        |
| SIP1 3'UTR rev                               | ACACTAGTTGGAATCAGGATCAGTTGAGAA                                                      |
| <b><u>ZEB1/SIP1 3'UTR mutagenesis</u></b>    |                                                                                     |
| ZEB1 miR-200b site 1 for                     | GCATCTGGCATTGTTTTATCTTATCAGGACTATCACTCTTATGTTGGTTTATTCTTA                           |
| ZEB1 miR-200b site 1 rev                     | CGTAGACCGTAACAAAATAGAATAGTCCTGATAGTGAGAATACAACCAAATAAGAAT                           |
| ZEB1 miR-200b site 2 for                     | ATTGGTAAACATATGCTAAATCCGCCTCAGGACTTTATTATGTTTTTAAAAATGTGAGAACTT                     |
| ZEB1 miR-200b site 2 rev                     | TAACCATTTGTATACGATTTAGGCGAAGTCTGAAATAATACAAAAAATTTTACTCTTGAA                        |
| ZEB1 miR-200b site 3 for                     | TGTAAGTGCCATTCTCAGGACTTTCAAGGCTCTAACCCGC                                            |
| ZEB1 miR-200b site 3 rev                     | ACATTCACGGTAAAGAGTCTGAAAGTTCGAGATTGGGCG                                             |
| ZEB1 miR-200b site 4 for                     | ATTAACAACATTAGCTGATTTTACCTATCAGGACTATTTTATTTCTTTAGTTTATAGATCTGTGC                   |
| ZEB1 miR-200b site 4 rev                     | TAATTGTTGTAATCGACTAAAAATGGATAGTCTGATAAAAAATAAGAAAAATCAAATATCTAGACACG                |
| ZEB1 miR-200b site 5 for                     | CTGTATGTCTTCAAACCTGGCAGGACTAATACCCCTTCTACTGACATAT                                   |
| ZEB1 miR-200b site 5 rev                     | GACATACAGAAGTTTGGACCGTCTGATTATGGGAAGAATGACTGTATA                                    |
| SIP1 miR-200b site 1 for                     | GGTGCCCGCACTACCATAACATCAGGACTTTTATTATTATTATTGTTATTCTCT                              |
| SIP1 miR-200b site 1 rev                     | CCACGGGCGTGATGGTATGTAGTCTGAAAAATAATAATAAACAATAAGGA                                  |
| SIP1 miR-200b site 2 for                     | GCTCGCACTACAATGCATCAGGACTATGATTCCTCTGTACTTTCC                                       |
| SIP1 miR-200b site 2 rev                     | CGAGCGTGATGTTACGTAGTCTGATACTAAGGAGACATGAAAGG                                        |
| SIP1 miR-200b site 3 for                     | CTTTGAAGCACCCATGTCAGCAGTAGAAGAATAGGCAGCAGTT                                         |
| SIP1 miR-200b site 3 rev                     | GAAACTTCGTGGGTACAGTCTGCTATCTTCTTATCCGTCGTCAA                                        |
| SIP1 miR-200b site 4 for                     | CTGTACTTTTTGTTCAATTAATTTTGTGACAGTACACCAAACCTGTTTTGCAACAAAAAAT                       |
| SIP1 miR-200b site 4 rev                     | GACATGAAAAACAAGTAATTAATAACAGTCTGCTATGTGGTTTGACAAAAACGTTGTTTTTTTA                    |
| SIP1 miR-200b site 5 for                     | TATTTCCCTAATTTTATTATTTCATACTGTAGTGTACAGCAGTATAGTCTTCAATATATAGATATATTTTAGTAAAAAAG    |
| SIP1 miR-200b site 5 rev                     | ATAAAGGATTAATAATAATAAAGTATGACATCACATGTCGTCATATCAAGAAGTTATATATCTATATAAAAAATCATTTTTTC |
| SIP1 miR-200b site 6 for                     | ATGACAAAAATCTTTCTGAAATTTGTTAAAGGACTATTGAAATTTCAATTTGTAATTTCTTTTGAAAAATG             |
| SIP1 miR-200b site 6 rev                     | TACTGTTTTTAGAAAAGGCTAACAGAAAAATTTTCTGATAACTTAAAAAGTTAAACATTAAGAAAAACTTTTAC          |
| <b><u>miR-200 family cluster cloning</u></b> |                                                                                     |
| miR-200b-200a-429 for                        | AGAATTCCTCACTCCGACCTAGTCCTC                                                         |
| miR-200b-200a-429 rev                        | AACCTAGGCTCCGGGTATCTGTGACTGTGAC                                                     |
| miR-200c-141 for                             | AGAATTCAGGGCTCACCAGGAAGTGT                                                          |
| miR-200c-141 rev                             | GTCTAGGAGGGGTGAAGGTCAGAGGTT                                                         |
| <b><u>miRNA knockdown</u></b>                |                                                                                     |
| 2'-O-methyl miR-200a                         | UUGAACAUUGUACCAGACAGUGUUAGAGUC                                                      |
| 2'-O-methyl miR-200b                         | CGCCGUAUCAUACCAGGCAGUAUUAGAGA                                                       |
| 2'-O-methyl miR-205                          | AUAGUCAGACUCCGGUGGAAUGAAGGACGAU                                                     |
| 2'-O-methyl control                          | CAUCACGUACGCGGAUACUUCGAAAAUGACC                                                     |
| <b><u>ZEB1 and SIP1 knockdown</u></b>        |                                                                                     |
| ZEB1-A siRNA                                 | GCCAACAGUUGGUUUGGUATT                                                               |
| ZEB1-B siRNA                                 | GCAUCCAAAGAACAAGAAATT                                                               |
| SIP1-A siRNA                                 | CCUCUUGUCAUCUGUACUUTT                                                               |
| SIP1-B siRNA                                 | GCAUGUAUGCAUGUGACUUTT                                                               |
